# Supplementary material for: Boto (Inia geoffrensis—Cetacea: Iniidae) aggregations in two provisioning sites in the lower Negro River—Amazonas, Brazil: are they related?
Source: PubMed Central journal article supplement (PMC6475133; doi:10.7717/peerj.6692), 2019-04-17

L(K) (mean  $\pm$  SD)

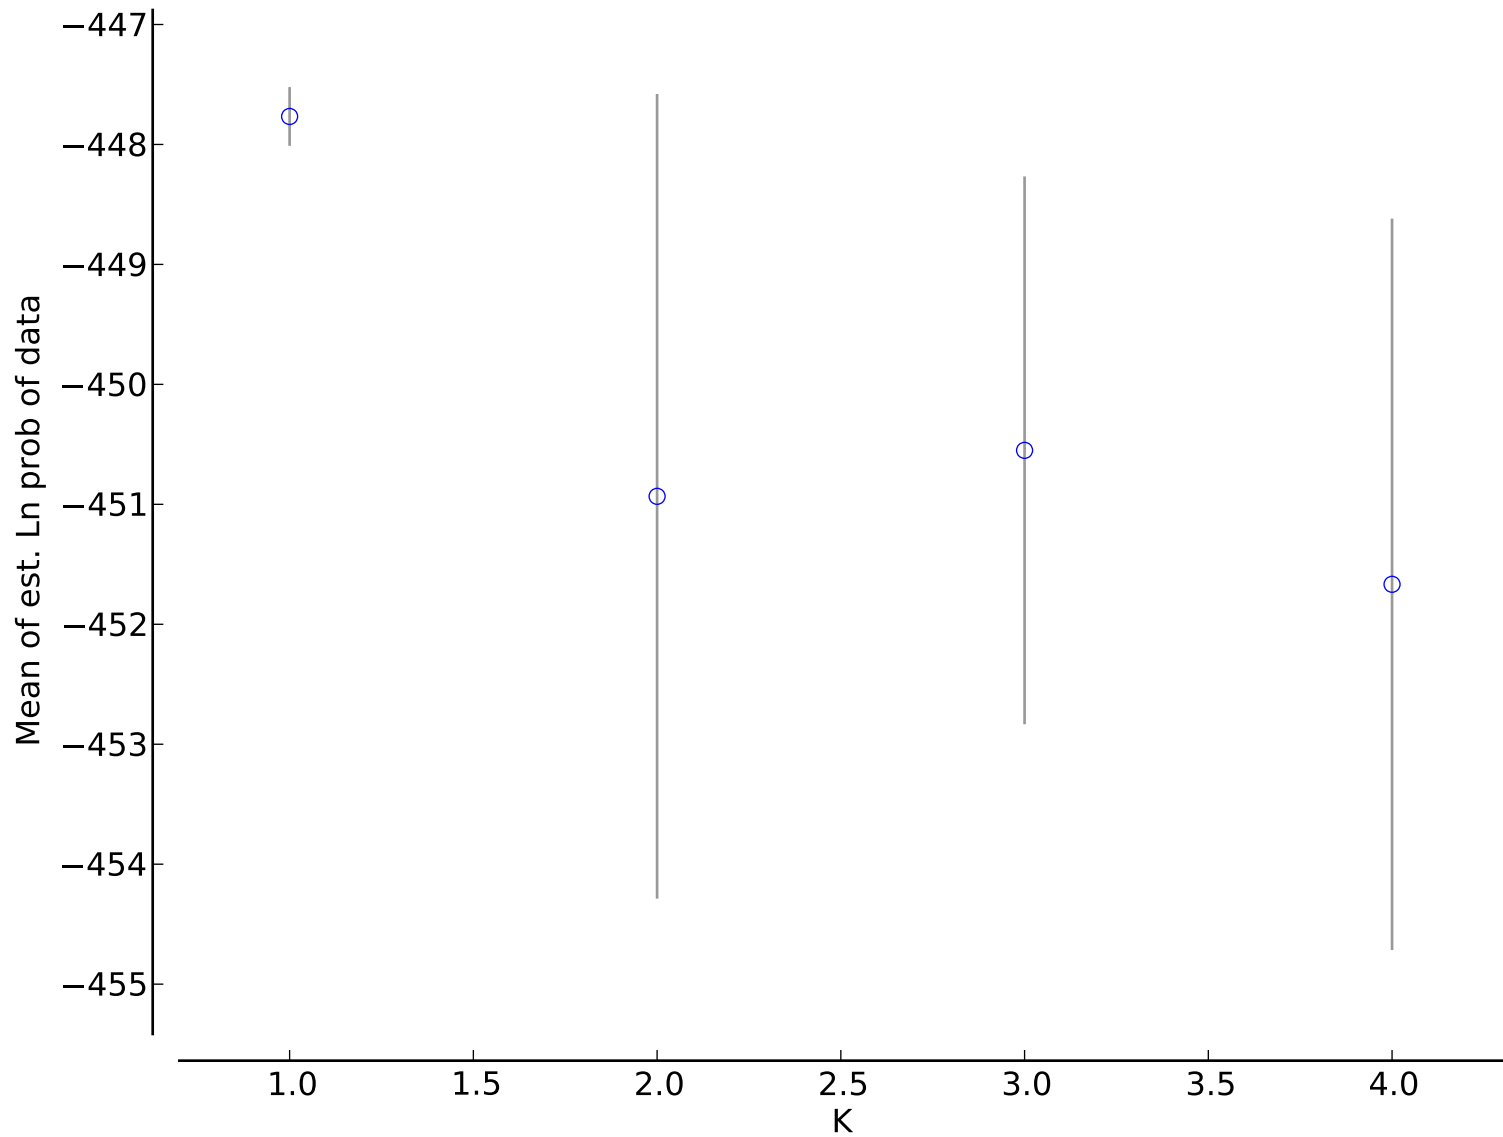

Supplement: peerj-07-6692-s002.pdf [file peerj-07-6692-s002.pdf]
